# Supplementary material for: Inferring the Origin of Cultivated Zizania latifolia, an Aquatic Vegetable of a Plant-Fungus Complex in the Yangtze River Basin
Source: Front Plant Sci. 2019 Nov 8;10:1406. doi: 10.3389/fpls.2019.01406 (PMC6856052; doi:10.3389/fpls.2019.01406)
Supplement: Supplementary file 6 [file Table_2.xlsx]

## Sheet: Supplementary Table 2
Supplementary Table 2 The detailed information of 135 cultivated accessions
Accession code	Accession name	Location (province)
Z1	Xiangan	Anhui
Z2	Hemudu	Zhejiang
Z3	Ningbosijiu	Zhejiang
Z4	Jinji(Golden Chicken)	Jiangsu
Z5	Datouqing	Jiangsu
Z6	Xinmin	Shanghai
Z7	Qinglian No.2	Jiangsu
Z8	Linchuan	Jiangxi
Z9	Gaomiao	Sichuan
Z10	Gufu	Hubei
Z11	Mojiang	Yunnan
Z12	Siyue(April)	Jiangsu
Z13	Jiangshu	Jiangsu
Z14	Chengjiang	Yunnan
Z15	Chaohu	Anhui
Z16	Puer	Yunnan
Z17	Gongan	Hubei
Z18	Xiang	Hunan
Z19	Wanjia	Sichuan
Z20	Damiaochang	Hubei
Z21	Leping	Jiangxi
Z22	Xuehu	Anhui
Z23	Qinglian No.0	Jiangsu
Z24	Tangjiang	Jiangxi
Z25	Qinglian No.1	Jiangsu
Z26	Pingxiang	Jiangxi
Z27	Chaohu No.2	Anhui
Z28	Dongcun	Henan
Z29	Qunli	Jiangsu
Z30	Loufeng	Jiangsu
Z31	Wuming(nameless)	N.A
Z32	Jian	Jiangxi
Z33	Shaoyang	Hunan
Z34	Baoan No.1	Hubei
Z35	Shilixiang No.2	Jiangxi
Z36	Xiangya(ivory)	Zhejiang
Z37	Tongcheng	Anhui
Z38	Lujiang	Anhui
Z39	Huishui	Guizhou
Z40	Sanlv	Fujian
Z41	Qiankou	Anhui
Z42	Hantou	Yunnan
Z43	Meinv(Beauty)	Anhui
Z44	Kangbayue	Jiangsu
Z45	Er No.3	Zhejiang
Z46	Yiyang	Hunan
Z47	Shijihu	Hunan
Z48	Wuhu	Anhui
Z49	8801-3	N.A
Z50	608	N.A
Z51	Xianju	Zhejiang
Z52	Xiaolatai	Jiangsu
Z53	Chikan	Guangdong
Z54	Guangchang	Jiangxi
Z55	Hezhong D	Anhui
Z56	Yuhang	Zhejiang
Z57	Tongan	Fujiang
Z58	Hantou No.2	Yunnan
Z59	208-03	N.A
Z60	Lijiagaoshan	Yunnan
Z61	Huzhen	Zhejiang
Z62	Luotuoqiao	Zhejiang
Z63	Zhongqiu	Jiangsu
Z64	Guangdong	Guangdong
Z65	Zhongyi97	Jiangsu
Z66	Zhonglatai	Jiangsu
Z67	Luan	Anhui
Z68	Liutan97	Jiangsu
Z69	Zhongcao	Jiangsu
Z70	Kuanzhuang3	Yunnan
Z71	Zigongdaan	Sichuan
Z72	Guixi	Jiangxi
Z73	Renhezhen	Guangdong
Z74	Rongcheng	Hebei
Z75	Changzhou8	Jiangsu
Z76	Mengzhe	Yunan
Z77	Wumahe	Guizhou
Z78	Shashi	Hubei
Z79	601	N.A
Z80	Zhongjie	Jiangsu
Z81	Guangyi38	Jiangsu
Z82	80-2	N.A
Z83	Maoshantou	Jiangsu
Z84	Baizhong	Jiangsu
Z85	Huangjinkan	Guangdong
Z86	Miandian	Myanmar
Z87	Kuangzhuang2	Yunnan
Z88	Zuru(Dwarf)	Jiangsu
Z89	Yun	Yunnan
Z90	Baoan	Hubei
Z91	Lujiang2	Anhui
Z92	Guilin	Guangxi
Z93	Shaoyang	Hunan
Z94	Jin No.1	Jiangsu
Z95	Huangshi	Hubei
Z96	Emeishan	Sichuan
Z97	Zhongxian	Chongqing
Z98	Wuwei	Anhui
Z99	Hanlu	Jiangsu
Z100	Er No.1	Zhejiang
Z101	Chaohu	Anhui
Z102	Kuangzhuang1	Yunnan
Z103	Hongqicun	Zhejiang
Z104	622	N.A
Z105	Mahu	Sichuan
Z106	Hezhong	Anhui
Z107	Changzhou7	Jiangsu
Z108	Chongqing1	Chongqing
Z109	Qiuyu	Jiangsu
Z110	Yueyang1	Hunan
Z111	Jiangsu	Jiangsu
Z112	Anshan	Hubei
Z113	Yugan	Jiangxi
Z114	Yuxi	Yunnan
Z115	Simao	Yunnan
Z116	Qingke	Jiangsu
Z117	Pujiang	Sichuang
Z118	Suizhou	Hubei
Z119	Zhejiang	Zhejiang
Z120	Huaian	Anhui
Z121	Anxi	Fujian
Z122	208	N.A
Z123	Yichang	Hubei
Z124	Chenggong	Yunnan
Z125	Liangshui	Sichuan
Z126	Kuangzhuang	Yunnan
Z127	Chong No.1	Shanghai
Z128	Changgang	Hubei
Z129	Huangwan	Zhejiang
Z130	Xitai	Shandong
Z131	Fengdu	Sichuan
Z132	Huanghucun	Jiangxi
Z133	Majiapu	Hubei
Z134	Shuangtangcun	Chongqing
Z135	Sanlv2	Fujian
